# Supplementary material for: Ubiquitin–proteasome system, lipid metabolism and DNA damage repair are triggered by antipsychotic medication in human oligodendrocytes: implications in schizophrenia
Source: PubMed Central journal article supplement (PMC7387551; doi:10.1038/s41598-020-69543-5), 2020-07-28
Supplement: 41598_2020_69543_MOESM1_ESM.pdf [file 41598_2020_69543_MOESM1_ESM.pdf]

# Ubiquitin-proteasome system, lipid metabolism and DNA damage repair are triggered by antipsychotic medication in human oligodendrocytes: implications in schizophrenia

Gabriela Seabra, Valéria de Almeida, Guilherme Reis-de-Oliveira, Fernanda Crunfli, André Saraiva Leão

Marcelo Antunes<sup>1</sup>, Daniel Martins-de-Souza<sup>\*</sup>

## Supplementary material

Supplementary table S1: Primers used for RT-qPCR (ACTB, PLP and CNPase forward and reverse sequences).

| Primer         | Function               | Sequence                 |
|----------------|------------------------|--------------------------|
| ACTB_Foward    | Housekeeping           | AGAGCTACGAGCTGCCTGAC     |
| ACTB_Reverse   | Housekeeping           | AGCACTGTGTTGGCGTACAG     |
| CNPase_Foward  | Oligodendrocyte Marker | AGGACCTCTGGGCTTTGATTCCAT |
| CNPase_Reverse | Oligodendrocyte Marker | ACTCCAGCTTGGGAAATAGCAGGA |
| PLP1_Foward    | Oligodendrocyte Marker | GCTGATGCCAGAATGTATGGTG   |
| PLP1_Reverse   | Oligodendrocyte Marker | CAATCATGAAGGTGAGCAGGG    |
